# Supplementary material
Source: MDPI journal article supplement (https://www.mdpi.com/2076-3417/13/3/1518)
Supplement: s1 [file s1]

## Supplementary Material

# Effect of white light-emitting-diode illuminants recommended by the CIE on colors of dental ceramic materials

Javier Ruiz-López<sup>1,2</sup>, Manuel Melgosa<sup>1</sup>, Razvan Ghinea<sup>1,2,3</sup>, Maria Tejada-Casado<sup>1,2</sup>, Ioana-Sofia Pop-Ciutrita<sup>4</sup> and María M. Pérez<sup>1,2\*</sup>

<sup>1</sup> Department of Optics, Faculty of Science, Campus Fuentenueva, Edificio Mecenas, s/n., University of Granada, 18071 Granada, Spain

<sup>2</sup> Instituto de Investigación Biosanitaria ibs.GRANADA, E18011 Granada, Spain.

<sup>3</sup> Department of Physics, Faculty of Sciences, University of Craiova, 13 AI Cuza Street, Craiova 200585, Romania.

<sup>4</sup> Department of Conservative Dentistry and Endodontics, Faculty of Dental Medicine, Iuliu Hatieganu University of Medicine and Pharmacy, 33 Motilor Street, 400001, Cluj-Napoca, Romania

\* Correspondence: mmperez@ugr.es; Tel.: +34-958246164.

**Table S1.** Abbreviation list

| Abbreviation | Definition                               |
|--------------|------------------------------------------|
| -00          | Associated with CIEDE2000                |
| $\Delta E$   | Color difference                         |
| AT           | Acceptability Thresholds                 |
| CAM          | Color Appearance Model                   |
| CAT          | Chromatic Adaptation Transform           |
| CCT          | Correlated Color Temperature             |
| CIE          | Commission Internationale de l'Éclairage |
| CRI          | Color Rendering Index                    |
| IEC          | IPS-Empress CAD Low Translucency         |
| LED          | Light Emitting Diode                     |
| MCDM         | Mean Color Difference from the Mean      |
| NSP          | Noritake Super Porcelain EX-3            |
| PT           | Perceptibility Thresholds                |
| SD           | Standard Deviation                       |
| SPD          | Spectral Power Distribution              |
| VST          | Vita Suprinity Translucent               |
